# Supplementary material for: PER2 interaction with HSP70 promotes cuproptosis in oral squamous carcinoma cells by decreasing AKT stability
Source: Springer Nature journal article supplement (doi:10.1038/s41419-025-07523-1), 2025-03-20
Supplement: MOESM1 [file 41419_2025_7523_MOESM1_ESM.pdf]

## **Supplementary Figures 1-5 for**

### **PER2 interaction with HSP70 promotes cuproptosis in oral squamous carcinoma cells by decreasing AKT stability**

Wenguang Yu<sup>1</sup>, Shilin Yin<sup>1</sup>, Hong Tang<sup>1</sup>, Hengyan Li<sup>1</sup>, Zhiwei Zhang<sup>1</sup>, and Kai Yang<sup>1</sup>

**Figure S1**

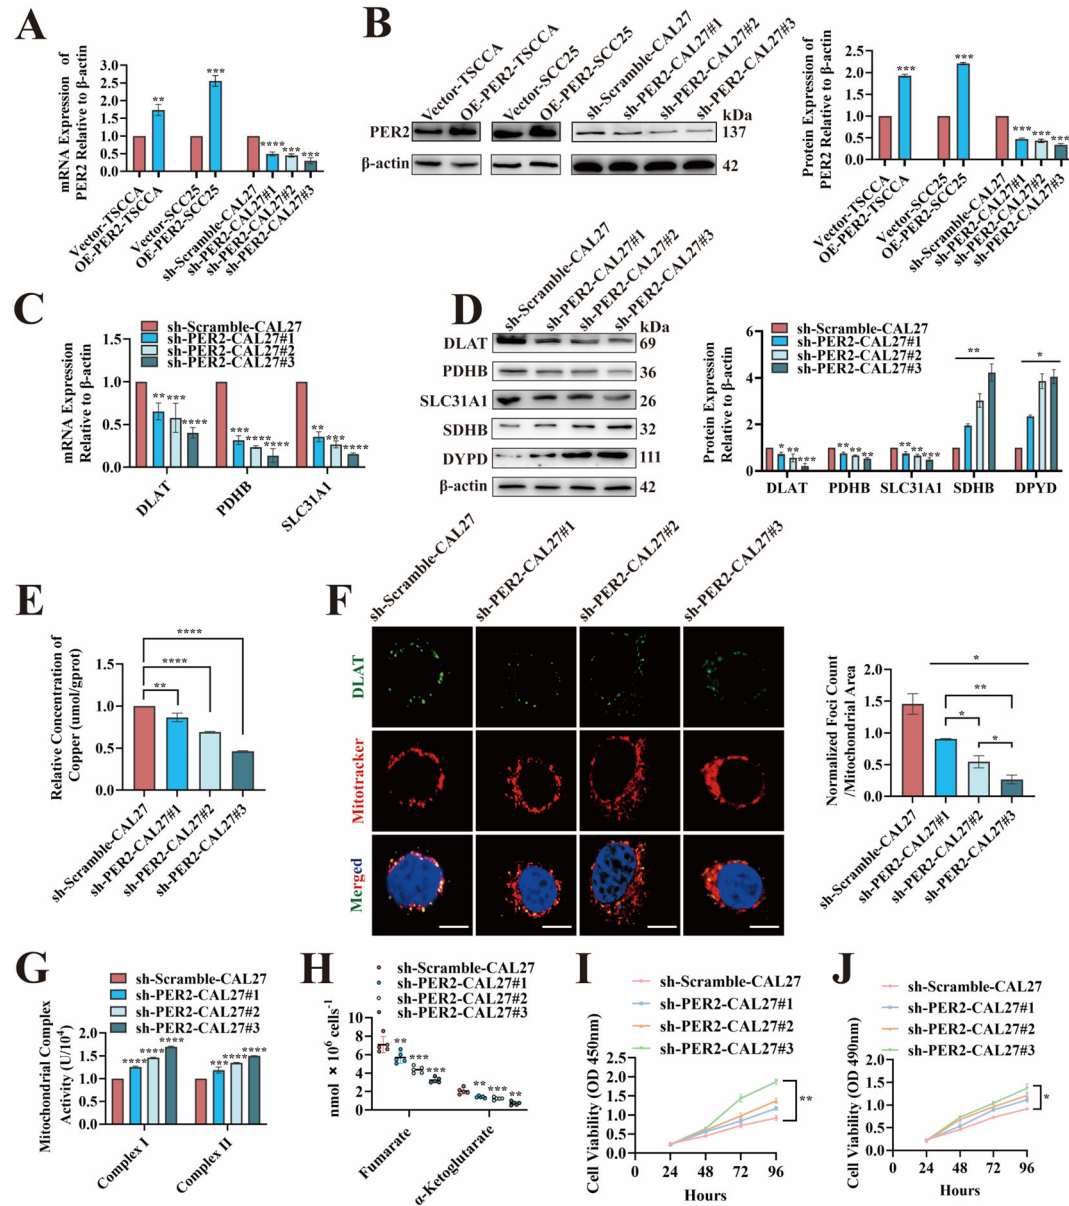

**Figure S1. Construction of OSCC cells stably transfected with overexpressing or silencing *PER2* and inhibition of OSCC cuproptosis by silencing *PER2***

TSCCA and SCC25 cells with relatively low *PER2* expression were selected among three OSCC cell types to construct OE-PER2-TSCCA and OE-PER2-SCC25 cells stably overexpressing *PER2*, with *PER2* overexpression efficiencies of  $1.93 \pm 0.03$  and  $2.21 \pm 0.02$ , respectively. Vector-TSCCA and Vector-SCC25 cells were used as control groups. CAL27 cells with relatively high *PER2* expression were selected, and sh-PER2-CAL27#1, sh-PER2-CAL27#2, and sh-PER2-CAL27#3

cells were constructed to stably silence *PER2* against three different effector targets, and sh-Scramble-CAL27 cells were used as a negative control. The *PER2* silencing efficiencies were  $52.9\% \pm 2.6\%$ ,  $56.8\% \pm 4.0\%$ , and  $66.0\% \pm 3.3\%$ , respectively. **A.** RT-qPCR showed significant increases in *PER2* mRNA expression in two OSCC cell types overexpressing *PER2* and significant decreases in *PER2* mRNA expression in OSCC cells silenced for *PER2* by three different effector targets, compared with control group. **B.** Western blotting showed significant increases in *PER2* protein expression in two OSCC cell types overexpressing *PER2* and significant decreases in *PER2* protein expression in OSCC cells from three different effector targets silencing *PER2*, as compared with control group. **C.** RT-qPCR showed that *DLAT*, *PDHB* and *SLC31A1* mRNA expression was significantly reduced in CAL27 cells with three different effector targets silencing *PER2* compared with control. **D.** Western blotting showed that *DLAT*, *PDHB* and *SLC31A1* protein expression was significantly reduced in CAL27 cells with *PER2* silenced by three different effector targets compared with control. **E.** Copper Colorimetric Assay Kit detected significantly lower copper concentrations in CAL27 cells silenced with *PER2* at three different effector targets compared with control. **F.** Immunofluorescence assay detected significant reductions of *DLAT* oligomers in CAL27 cells with *PER2* silenced by three different effector targets compared with control (yellow, *DLAT* oligomer; green, *DLAT*; red, Mitotracker; blue, DAPI; scale bars = 50  $\mu$ m; three independent experiments). **G.** Micro-mitochondrial Complex I and II Activity Assay Kit detected significant increases in electron transport chain complex I and II activity in CAL27 cells with *PER2* silenced by three different effector targets compared with control. **H.** Fumarate Assay Kit and  $\alpha$ -KG Assay Kit showed that the concentrations of fumarate and  $\alpha$ -ketoglutarate were significantly reduced in CAL27 cells with *PER2* silenced by three different effector targets compared with control. **I.** CCK-8 assay showed that the proliferation levels of CAL27 cells with *PER2* silenced by three different effector targets were significantly decreased compared with control group. **J.** MTT assay showed that the proliferation levels of CAL27 cells with *PER2* silenced by three different effector targets were significantly increased compared with control group. All data represent three replicate independent experiments. Data are presented as mean  $\pm$  SD.  $*P < 0.05$ ;  $**P < 0.01$ ;  $***P < 0.001$ ;  $****P < 0.0001$ .

**Figure S2**

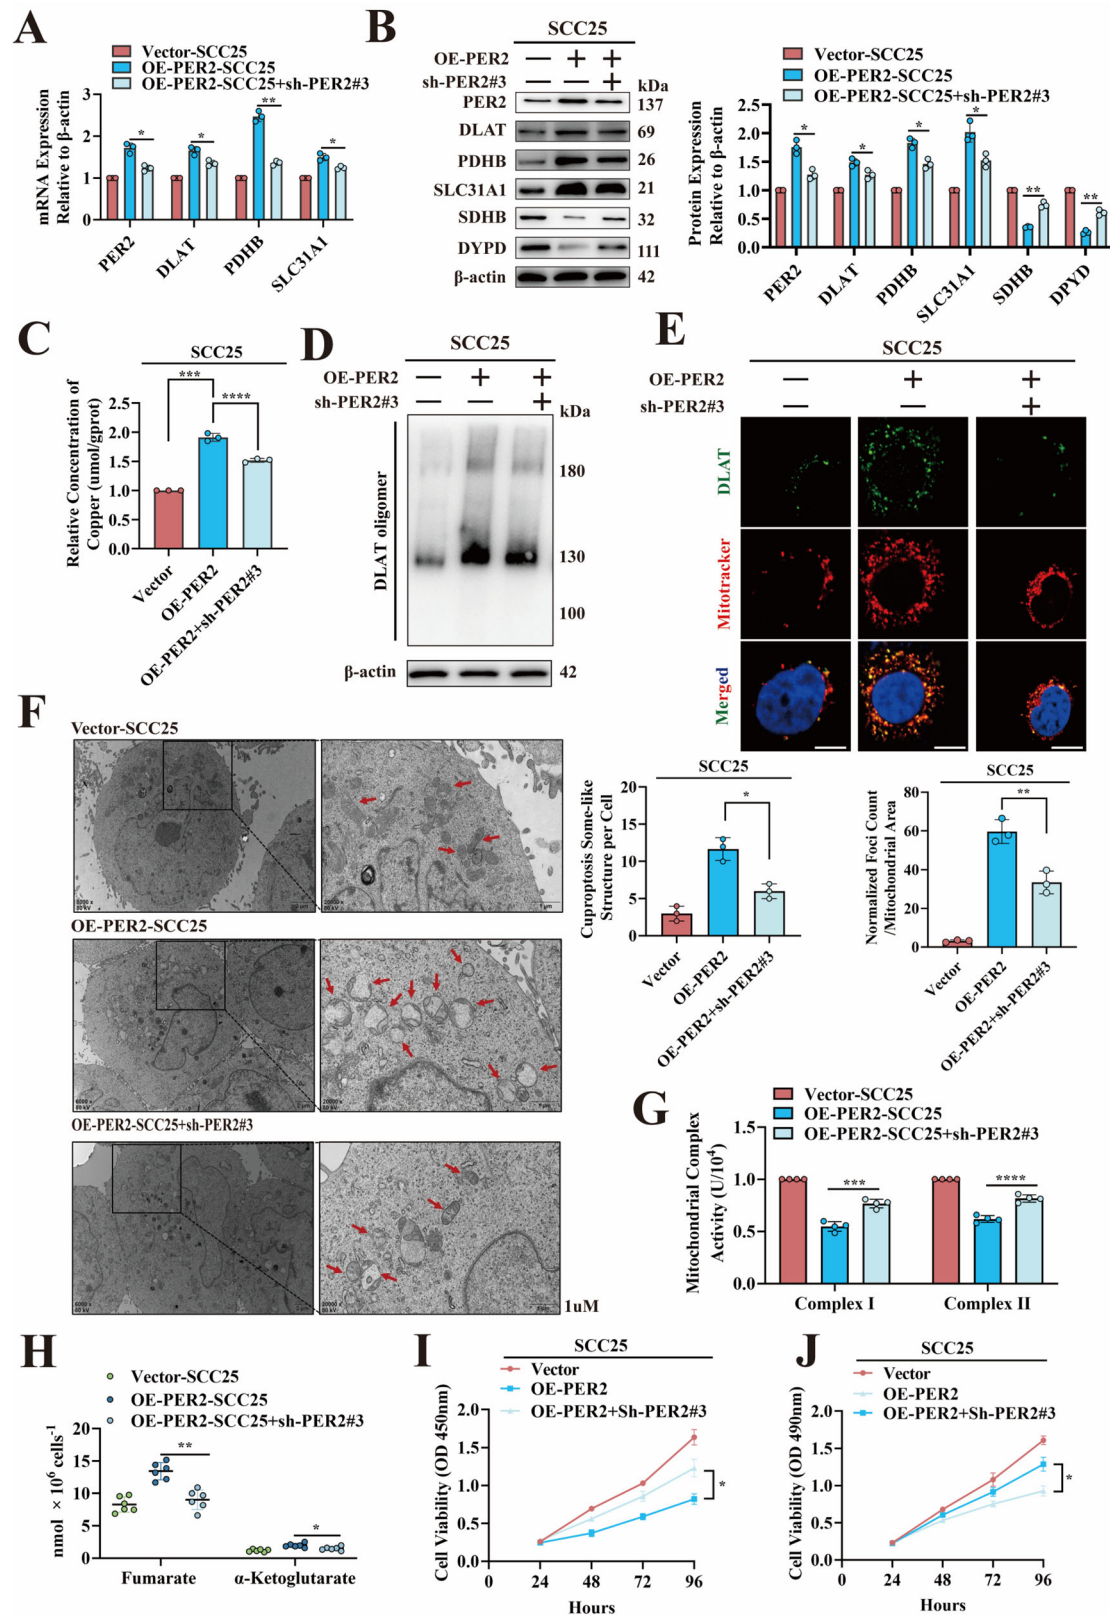

**Figure S2. The occurrence of cuproptosis in OSCC is dependent on *PER2***

**A.** RT-qPCR showed, *PER2*, *DLAT*, *PDHB* and *SLC31A1* mRNA expression was significantly reduced in OE-*PER2*-SCC25 cells transfected with sh-*PER2*#3 as compared with OE-*PER2*-SCC25 cells. **B.** Western blotting showed, *PER2*, *DLAT*, *PDHB*, *SLC31A1*, *SDHB*, and *DYPD* protein expression was significantly reduced in OE-*PER2*-SCC25 cells transfected with sh-*PER2*#3 compared with OE-*PER2*-SCC25 cells. **C.** Copper Colorimetric Assay Kit showed a significant reduction of copper levels in OE-*PER2*-SCC25 cells transfected with sh-*PER2*#3 compared with OE-*PER2*-SCC25 cells. **D.** Non-denaturing gel electrophoresis assay showed the *DLAT* oligomers were reduced after transfection of OE-*PER2*-SCC25 cells with sh-*PER2*#3 compared with OE-*PER2*-SCC25 cells. **E.** Immunofluorescence assay showed, *DLAT* oligomers were significantly reduced in OE-*PER2*-SCC25 cells transfected with sh-*PER2*#3 compared with OE-*PER2*-SCC25 cells (yellow, *DLAT* oligomer; green, *DLAT*; red, Mitotracker; blue, DAPI; scale bars = 50  $\mu$ m; three independent experiments). **F.** TEM observed a significant decrease in the amount of vacuolated mitochondria, as well as a reduction in mitochondrial deformation and swelling, after transfecting sh-*PER2*#3 into OE-*PER2*-SCC25 cells as compared with OE-*PER2*-SCC25 cells (red arrows indicate mitochondria; three independent experiments). **H.** Fumarate Assay Kit and  $\alpha$ -KG Assay Kit detected concentrations of fumarate and  $\alpha$ -ketoglutarate were significantly reduced after transfection of OE-*PER2*-SCC25 cells with sh-*PER2*#3 compared with OE-*PER2*-SCC25 cells. **I.** CCK-8 assay showed, cell proliferation levels were significantly increased in OE-*PER2*-SCC25 cells transfected with sh-*PER2*#3 compared with OE-*PER2*-SCC25 cells. **J.** MTT assay showed, cell proliferation levels were significantly increased in OE-*PER2*-SCC25 cells transfected with sh-*PER2*#3 compared with OE-*PER2*-SCC25 cells. All data represent three independent experiments. Data are expressed as means  $\pm$  SD ( $n \geq 3$ ). \* $P < 0.05$ ; \*\* $P < 0.01$ ; \*\*\* $P < 0.001$ ; \*\*\*\* $P < 0.0001$ .

**Figure S3**

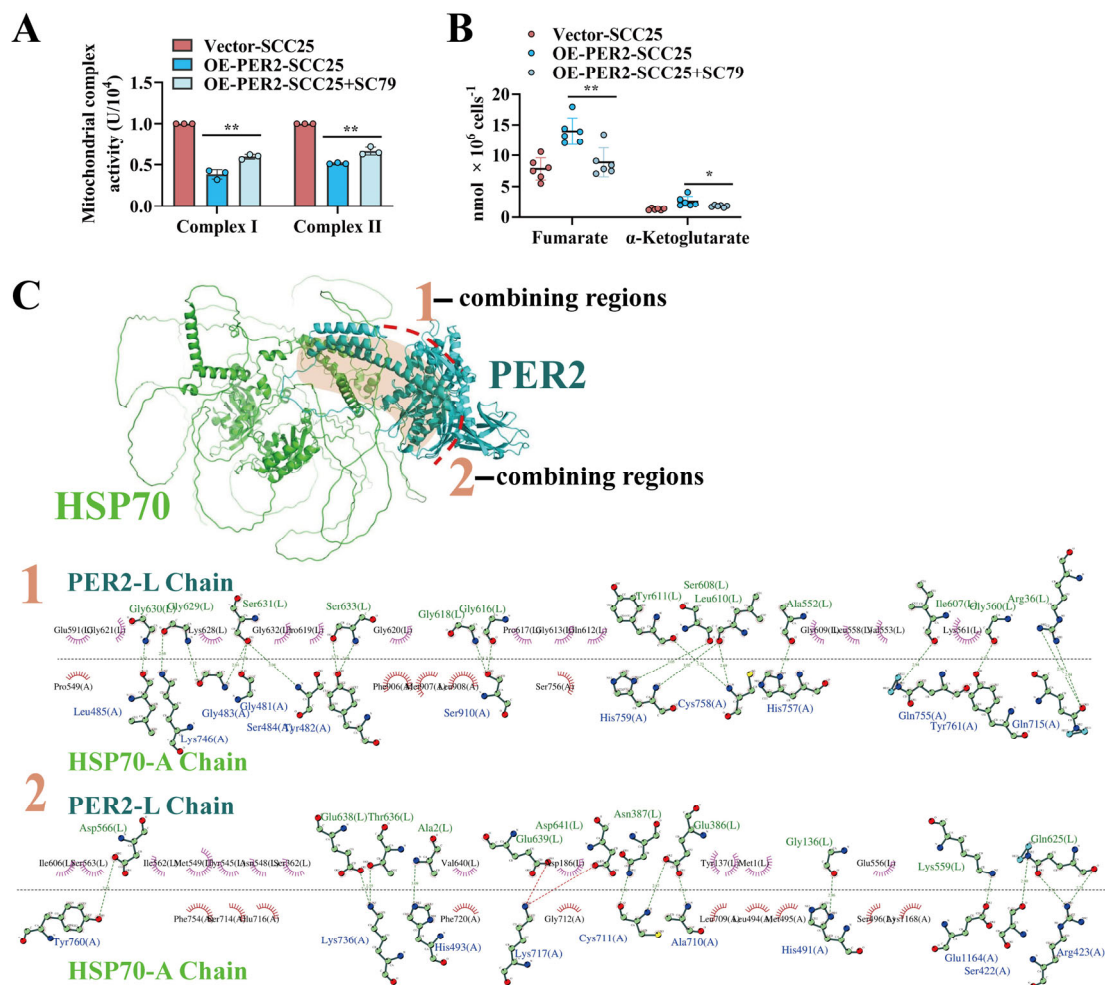

**Figure S3. Protein–protein docking prediction**

**A.** Micro-mitochondrial Complex I and II Activity Assay Kit showed a significant increase in electron transport chain complex I and II activity after addition of SC79 to OE-PER2-SCC25 cells.

**B.** Fumarate Assay Kit and  $\alpha$ -KG Assay Kit detected the concentration of fumarate and  $\alpha$ -ketoglutarate was significantly reduced by the addition of SC79 to OE-PER2-SCC25 cells.

**C.** Protein–protein docking predicted two binding sites for PER2 and HSP70 proteins, both of which are located in C-terminal structural domains of PER2 (L-chain for PER2, A-chain for HSP70, numbers denote peptide positions, letters denote amino acid abbreviations). All data represent three replicate independent experiments. Data are presented as mean  $\pm$  SD. \* $P$  < 0.05; \*\* $P$  < 0.01; \*\*\* $P$  < 0.001; \*\*\*\* $P$  < 0.0001.



**Figure S4**

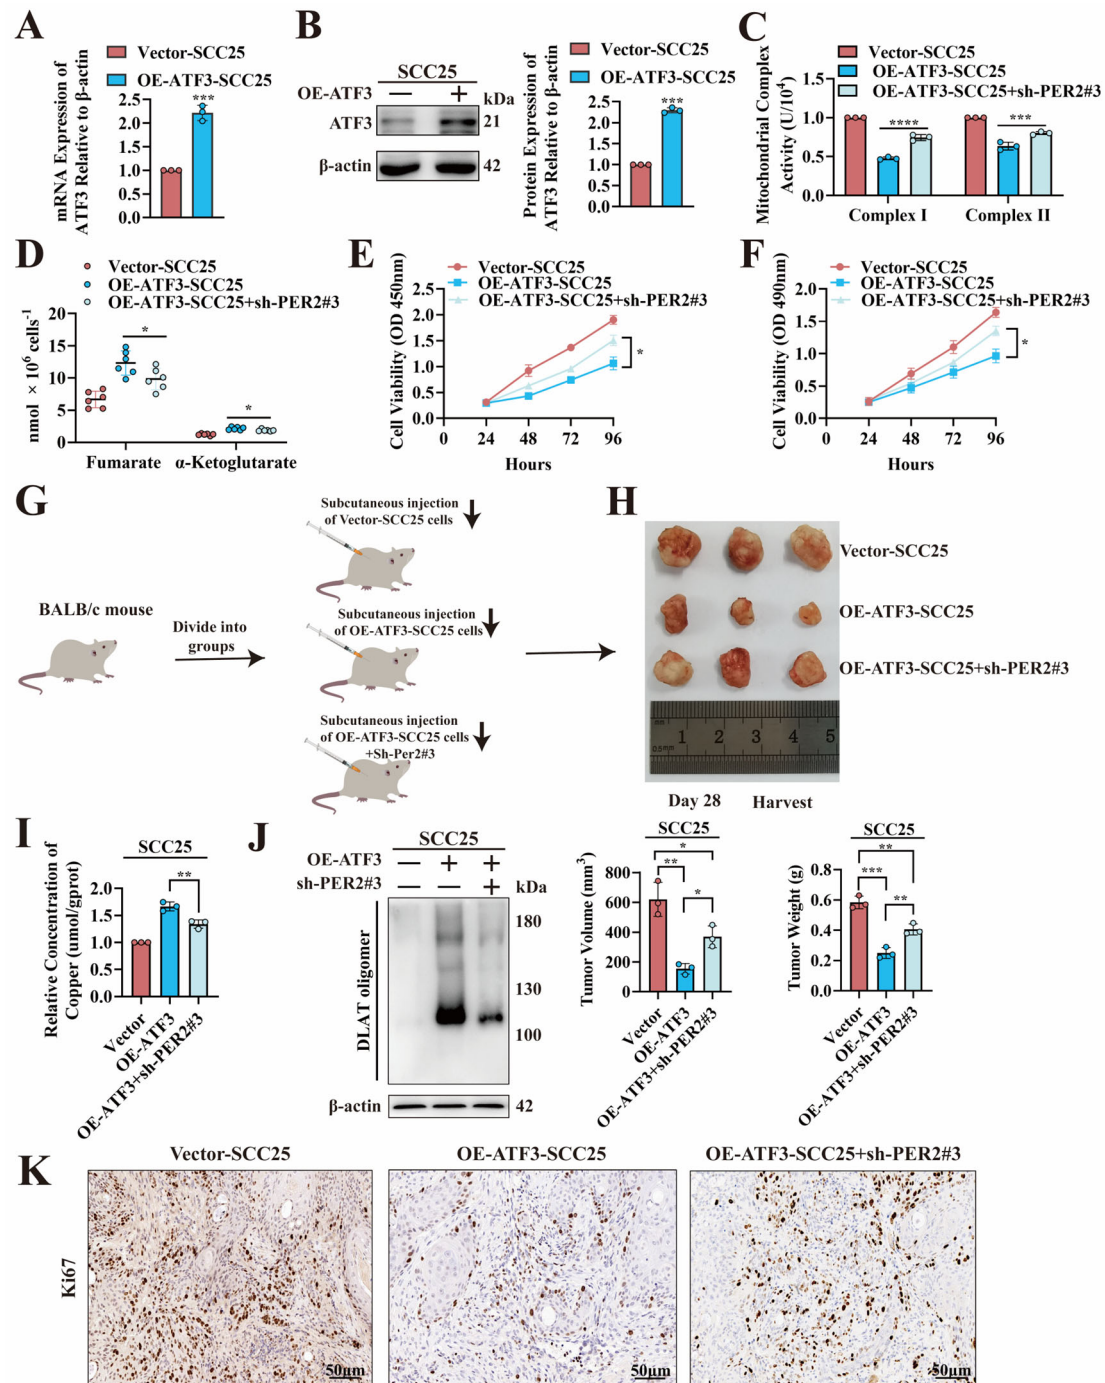

**Figure S4. Construction of overexpressing *ATF3*-stable strains and *ATF3* promotion of OSCC cuproptosis-dependent PER2**

OE-ATF3-SCC25 cells with stable overexpression of *ATF3* was constructed in SCC25 cells with an *ATF3* overexpression efficiency of  $2.29 \pm 0.07$ . Vector-SCC25 cells were used as a control. **A**, RT-qPCR showed, *ATF3* mRNA expression was significantly increased in OE-ATF3-SCC25 cells

compared with Vector-SCC25 cells. **B.** Western blotting showed, ATF3 protein expression was significantly increased in OE-ATF3-SCC25 cells compared with Vector-SCC25 cells. **C.** Micro-mitochondrial Complex I and II Activity Assay Kit detected mitochondrial electron transport chain complex I and II activity was significantly enhanced in OE-ATF3-SCC25+sh-*PER2#3* cells compared with OE-ATF3-SCC25 cells. **D.** Fumarate Assay Kit and  $\alpha$ -KG Assay Kit detected concentrations of fumarate and  $\alpha$ -ketoglutarate were significantly lower in OE-ATF3-SCC25+sh-*PER2#3* cells compared with OE-ATF3-SCC25 cells. **E.** CCK-8 assay showed, the proliferation level of OE-ATF3-SCC25+sh-*PER2#3* cells was significantly enhanced compared with OE-ATF3-SCC25 cells. **F.** MTT assay showed, the proliferation level of OE-ATF3-SCC25+sh-*PER2#3* cells was significantly enhanced compared with OE-ATF3-SCC25 cells. **G.** Schematic diagram of subcutaneous OSCC models established in BALB/c nude mice by subcutaneous inoculation of Vector-SCC25, OE-ATF3-SCC25 and OE-ATF3-SCC25+sh-*PER2#3* cells. **H.** Subcutaneous tumor formation assay of nude mice: nude mice were injected subcutaneously with Vector-SCC25, OE-ATF3-SCC25, and OE-ATF3-SCC25+sh-*PER2#3* cells, and the tumor weight and volume were measured after harvesting tumors on day 28. **I.** Copper Colorimetric Assay Kit for the detection of copper in tumors of Vector-SCC25, OE-ATF3-SCC25 and OE-ATF3-SCC25+ sh-*PER2#3* groups. **J.** Non-denaturing gel electrophoresis assay for detecting DLAT oligomers in tumors of Vector-SCC25, OE-ATF3-SCC25 and OE-ATF3-SCC25+sh-*PER2#3* groups. **K.** IHC assay for Ki67 expression in tumors of Vector-SCC25, OE-ATF3-SCC25 and OE-ATF3-SCC25+sh-*PER2#3* groups (n = 3, scale bars = 50 $\mu$ m). All data represent three replicate independent experiments. Data are presented as mean  $\pm$  SD. \* $P$  < 0.05; \*\* $P$  < 0.01; \*\*\* $P$  < 0.001; \*\*\*\* $P$  < 0.0001.



**Figure S5**

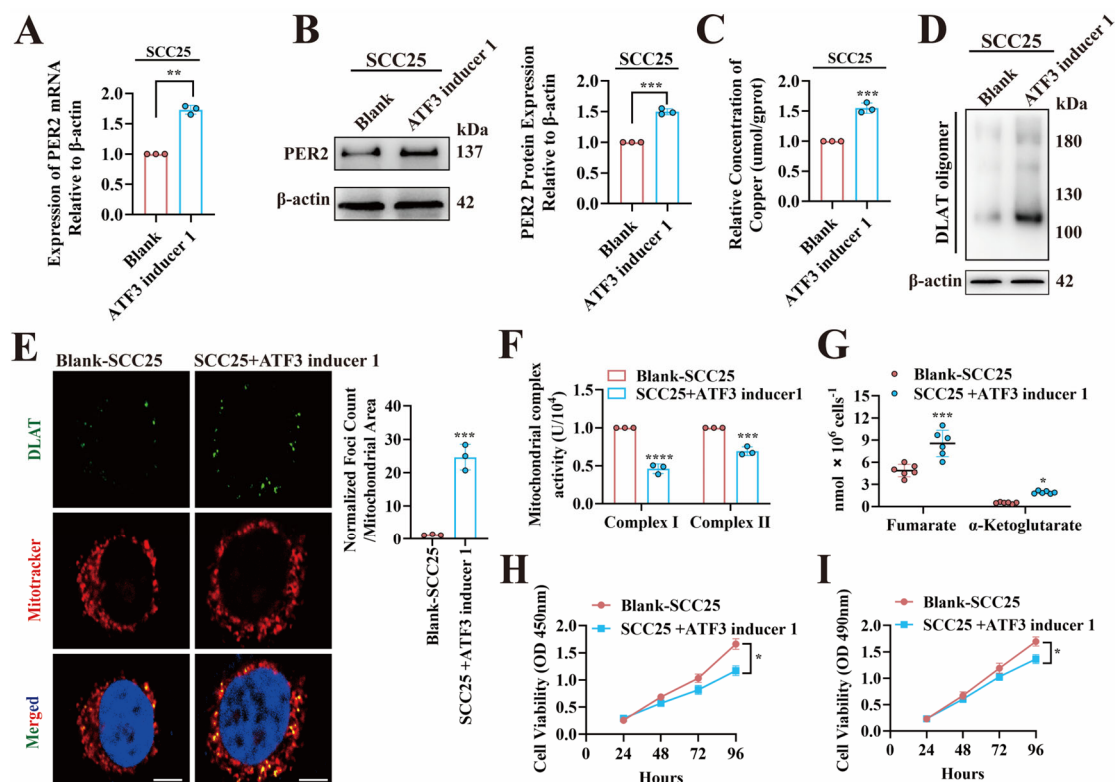

**Figure S5. ATF3 inducer 1 targets upregulation of *PER2* to promote OSCC cuproptosis**

The following assays were performed in SCC25 cells after the addition of ATF3 inducer 1. **A.** RT-qPCR for *PER2* mRNA expression. **B.** Western blotting for *PER2* protein expression. **C.** Copper Colorimetric Assay Kit for copper in cells. **D.** Non-denaturing gel electrophoresis assay for DLAT oligomers in cells. **E.** Immunofluorescence assay for DLAT oligomers in cells (yellow, DLAT oligomer; green, DLAT; red, Mitotracker; blue, DAPI; scale bars = 50  $\mu$ m; three independent experiments). **F.** Micro-mitochondrial Complex I and II Activity Assay Kit for determining mitochondrial electron transport complex I and II activity in cells. **G.** Fumarate Assay Kit and  $\alpha$ -KG Assay Kit for measuring levels of fumarate and  $\alpha$ -Ketoglutaric in cells. **H.** CCK-8 assay for determining levels of cell proliferation. **I.** MTT assay for detecting levels of cell proliferation. All data represent three replicate independent experiments. Data are presented as mean  $\pm$  SD. \* $P$  < 0.05; \*\* $P$  < 0.01; \*\*\* $P$  < 0.001; \*\*\*\* $P$  < 0.0001.
